# Supplementary material for: ER-phagy requires the assembly of actin at sites of contact between the cortical ER and endocytic pits
Source: PubMed Central journal article supplement (PMC8833162; doi:10.1073/pnas.2117554119), 2022-01-31
Supplement: pnas.2117554119.sapp.pdf [file pnas.2117554119.sapp.pdf]

Supplementary Information for

## **ER-phagy requires the assembly of actin at sites of contact between the cortical ER and endocytic pits**

Dongmei Liu<sup>1</sup>, Muriel Mari<sup>2</sup>, Xia Li<sup>1</sup>, Fulvio Reggiori<sup>2</sup>, Susan Ferro-Novick<sup>1</sup>

and Peter Novick<sup>1</sup>

Peter Novick and Susan Ferro-Novick

Email: [pnovick@health.ucsd.edu](mailto:pnovick@health.ucsd.edu) or [sferronovick@health.ucsd.edu](mailto:sferronovick@health.ucsd.edu)

### **This PDF file includes:**

Figures S1 to S8  
Tables S1 to S2  
Legends for Movies S1 to S2

### **Other supplementary materials for this manuscript include the following:**

Movies S1 to S2

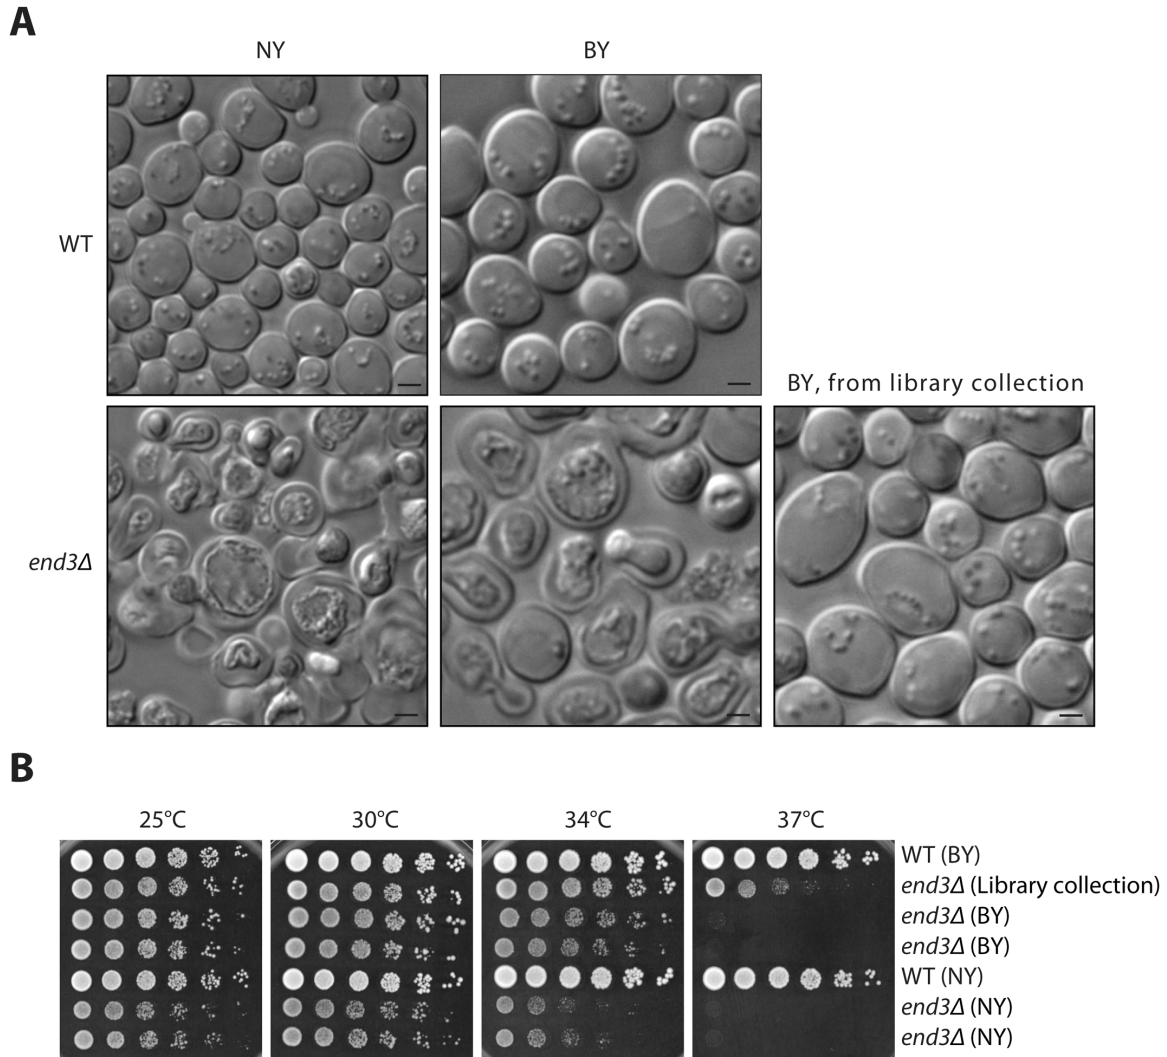

**Fig. S1. The *end3Δ* strain from the deletion library collection displays altered morphology and growth.** (A) Rtn1 was tagged with GFP in WT (NY background), *end3Δ* (NY background), WT (BY background), *end3Δ* (BY background) and *end3Δ* (BY background from deletion library collection). Cells were induced with rapamycin for 16 h and then a DIC image was acquired. Scale bar, 2  $\mu$ m. (B) Indicated strains were grown to an early log phase in YPD medium at 25°C, serially diluted and spotted on YPD plates. The plates were then incubated for 2 d at 25°C, 30°C, 34°C and 37°C, respectively.

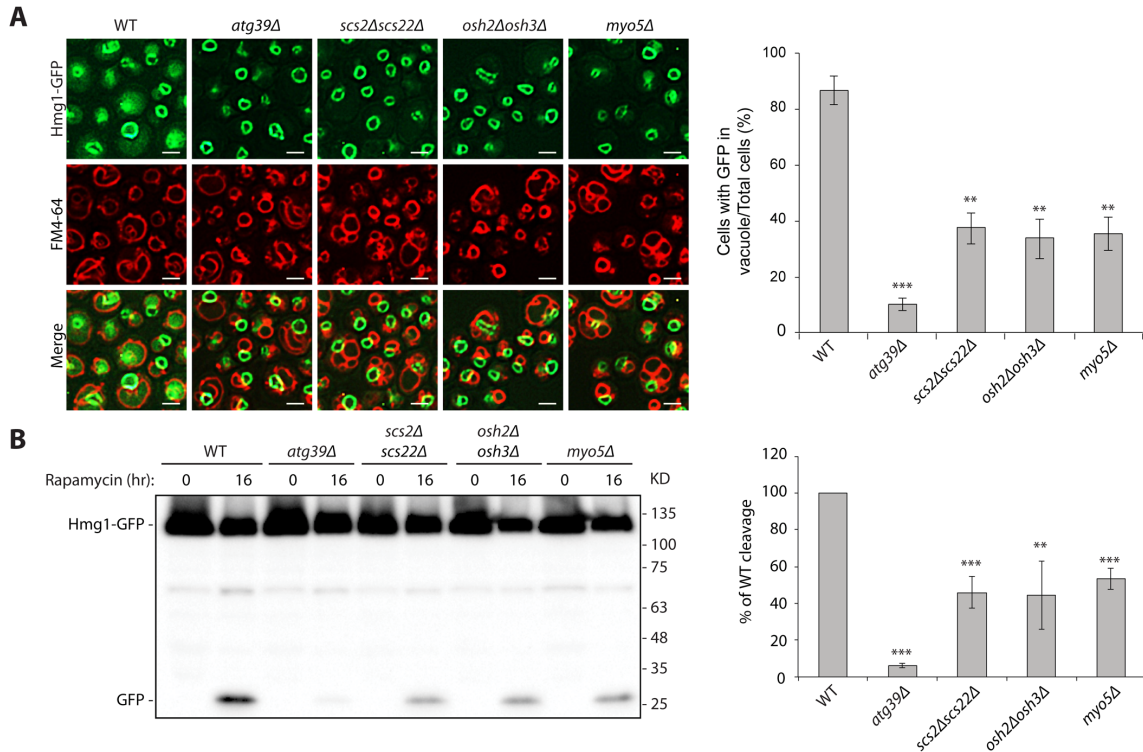

**Fig. S2. Proteins linking the cER to endocytic sites are important for delivery of Hmg1 into the vacuole.** (A) *Scs2/Scs22*, *Osh2/Osh3* and *Myo5* are required for delivery of Hmg1 into the vacuole. Left panel, fluorescence images of cells expressing Hmg1-GFP. Cells were treated with rapamycin for 16 h and vacuoles were stained with FM4-64. Right panel, the percentage of cells with GFP in the vacuole was quantified. Error bars represent SD, N = 3 independent experiments. \*\*, P < 0.01; \*\*\*, P < 0.001. Student's t-test. Scale bar, 2  $\mu$ m. (B) Left panel, western blot of Hmg1-GFP cleavage after cells were treated with rapamycin for 16 h. Right panel, percentage of free GFP divided by the total GFP amount was quantified. WT was set as 100%. All mutants were normalized to the WT control. Error bars represent SD, N = 3 independent experiments. \*\*, P < 0.01; \*\*\*, P < 0.001. Student's t-test.

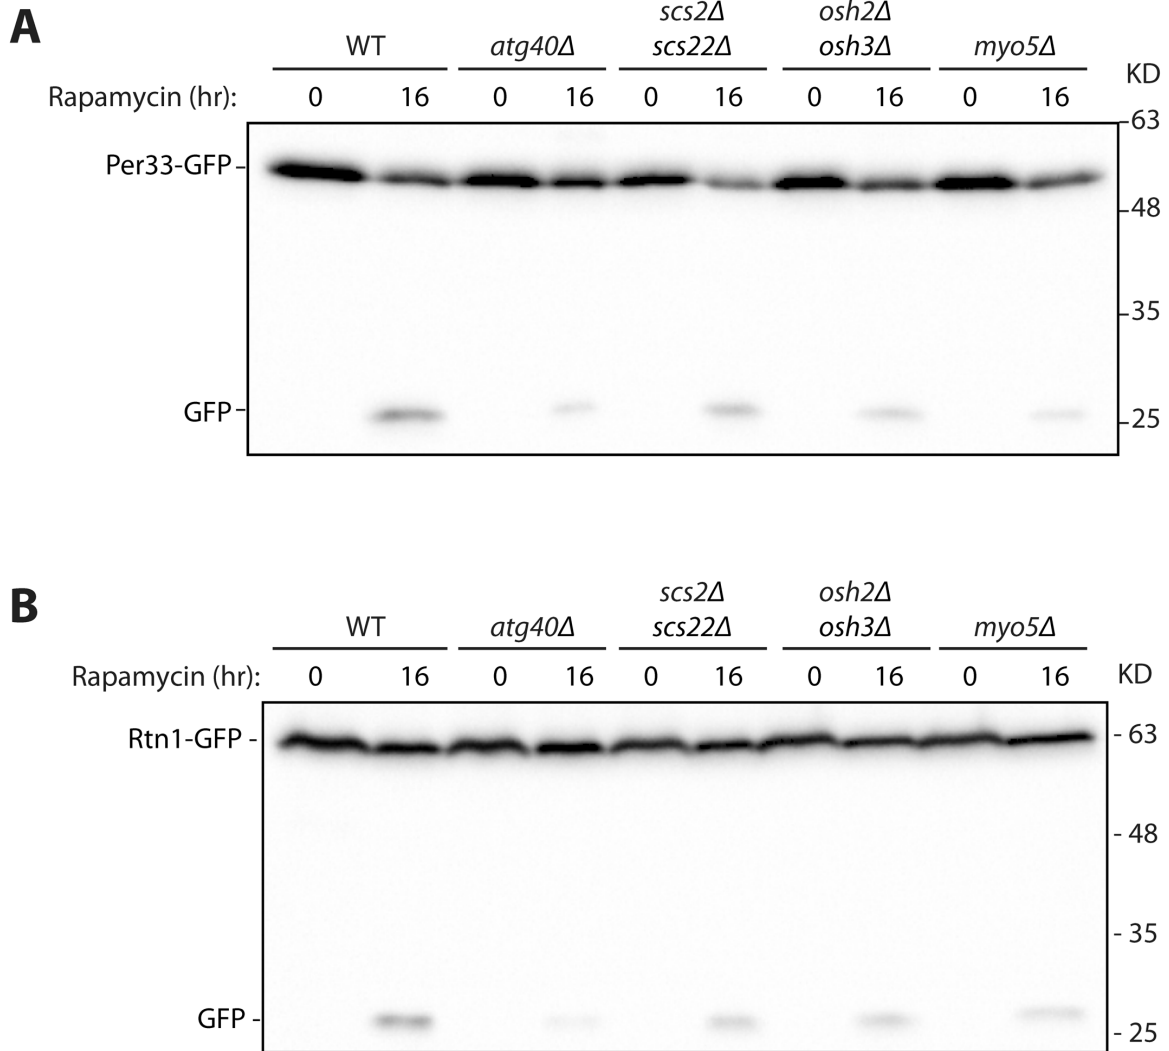

**Fig. S3. Proteins linking the cER to endocytic sites are important for ER-phagy.** (A) Western blot analysis of Per33-GFP cleavage after cells were treated with rapamycin for 16 h. This is the same blot as Fig. 2B, but with a shorter exposure time. (B) Western blot analysis of Rtn1-GFP cleavage after cells were treated with rapamycin for 16 h. This is the same blot as Fig. 2D, but with a shorter exposure time.

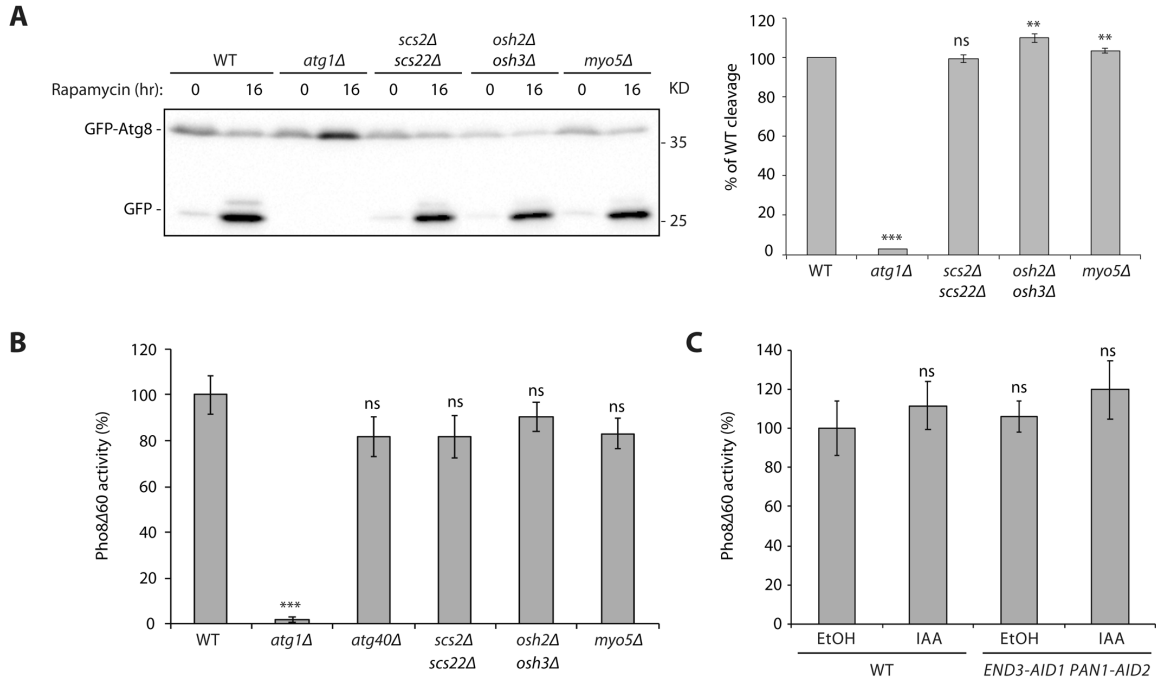

**Fig. S4. Scs2/Scs22, Osh2/Osh3 and Myo5 are not involved in bulk autophagy.** (A) Left panel. Western blot of GFP-Atg8 cleavage after cell treatment with rapamycin for 16 h. Right panel. The percentage of free GFP divided by the total GFP amount was quantified. WT was set at 100% and all mutants were normalized to the WT control. Error bars represent SD, N = 3 independent experiments. NS, non-significant ( $P \geq 0.05$ ); \*\*,  $P < 0.01$ . \*\*\*,  $P < 0.001$ . Student's t-test. (B) ALP activity was analyzed in cells expressing Pho8Δ60 as described in the Materials and Methods. Autophagy was induced with rapamycin for 16 h. WT was set at 100% and all mutants were normalized to the WT control. Error bars represent SD, N = 3 independent experiments. NS, non-significant ( $P \geq 0.05$ ). \*\*\*,  $P < 0.001$ . Student's t-test. (C) ALP activity was analyzed in WT and the End3-AID1- and Pan1-AID2-co-expressing strain that was treated with either EtOH or IAA before incubation with rapamycin for 3 h. EtOH-treated WT cells were set at 100% and others were normalized to the EtOH-treated WT cells. Error bars represent SD, N = 3 independent experiments. NS, non-significant ( $P \geq 0.05$ ). Student's t-test.

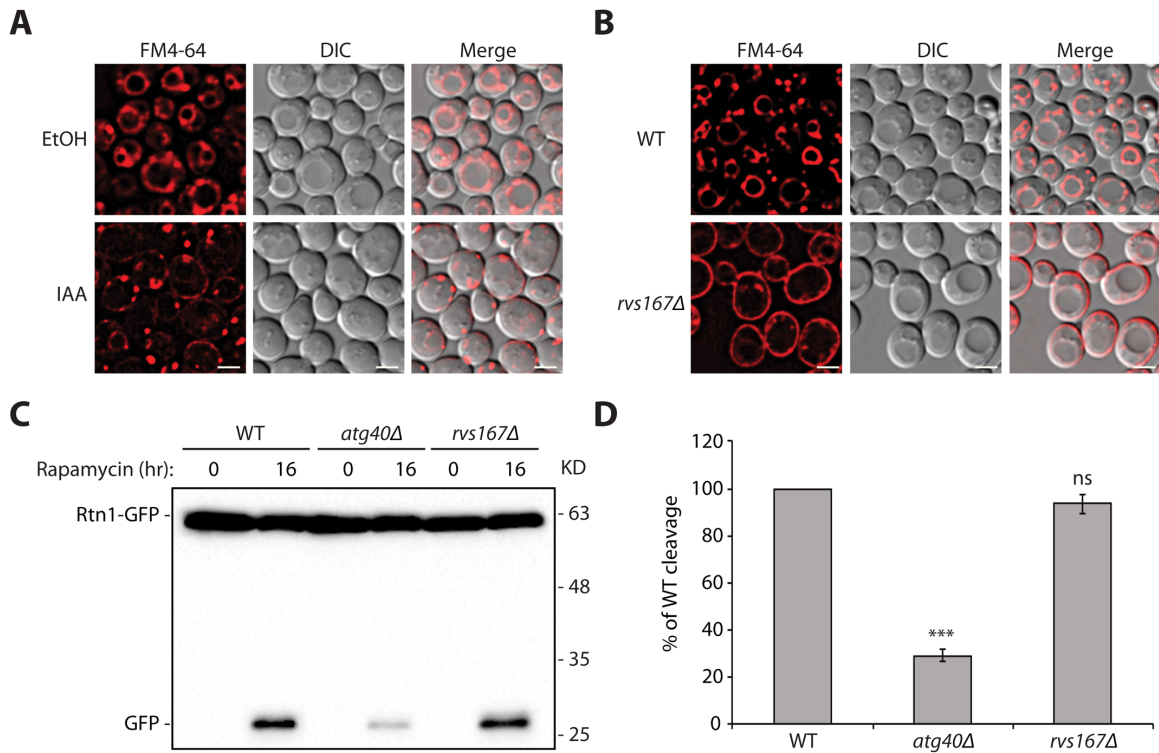

**Fig. S5. (A) Induced degradation of Myo3 and Myo5 blocks endocytic uptake of FM4-64.** Cells expressing *MYO3-AID1* and *MYO5-AID2* were pre-treated with either EtOH or IAA for 90 min before the addition of FM4-64. Uptake was assayed as described in the Materials and Methods. **(B-D) Deletion of *rvs167* blocks endocytosis but not ER-phagy (B).** Uptake of FM4-64 was assayed as described in the Materials and Methods. **(C)** The *rvs167Δ* strain is not deficient in cER-phagy. Western blot analysis of Rtn1-GFP cleavage after WT, *atg40* and *rvs167Δ* cells were treated with rapamycin for 16 h. **(D)** The percentage of free GFP divided by the total GFP in (C) was quantified. WT was set as 100%. All mutants were normalized to the WT control. Error bars represent SD, N = 3 independent experiments. \*\*\*, P < 0.001. NS, non-significant (P ≥ 0.05). Student's t-test.

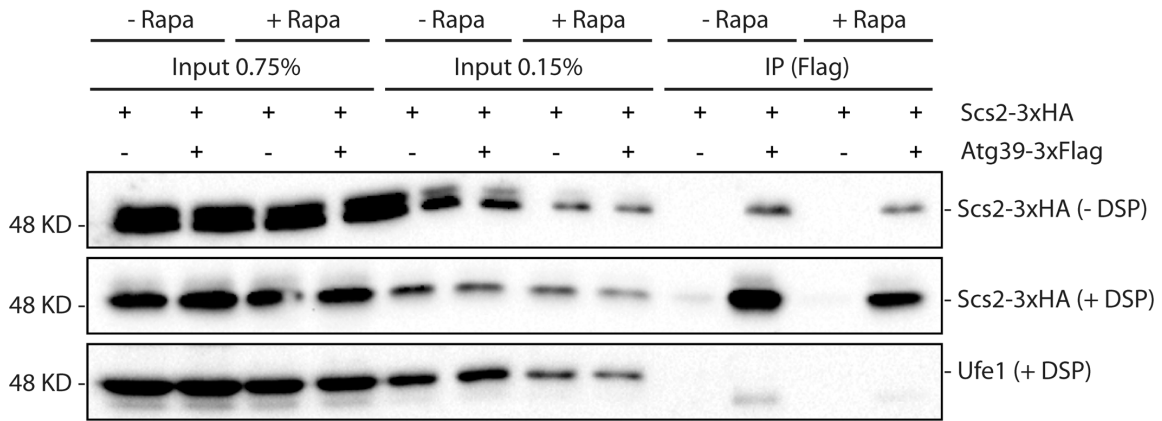

**Fig. S6. Scs2 interacts with Atg39 *in vivo*.** Atg39-3xFlag was precipitated from lysates of cells treated with or without rapamycin. Cell lysates were pretreated with (+ DSP) or without (-DSP) the crosslinking reagent DSP. The precipitates were blotted with anti-HA antibodies to detect Scs2-3xHA, and the Ufe1 rabbit antiserum to detect Ufe1.

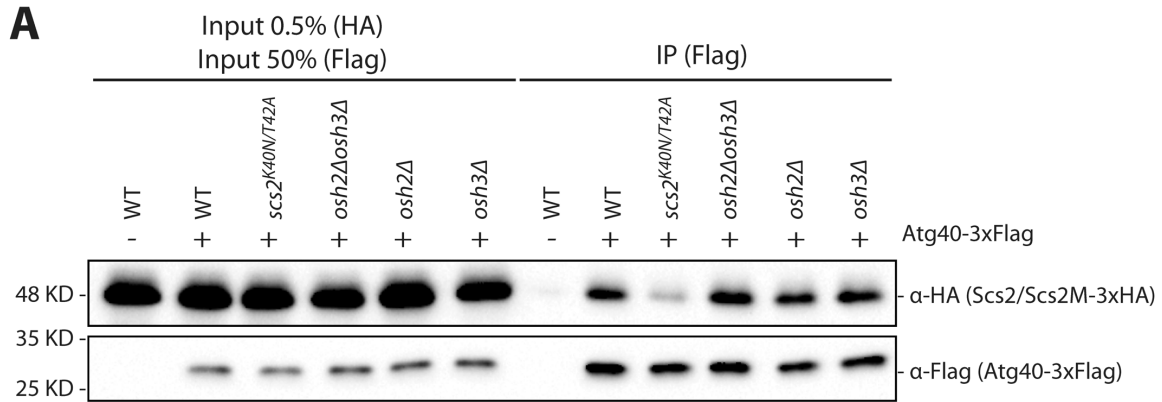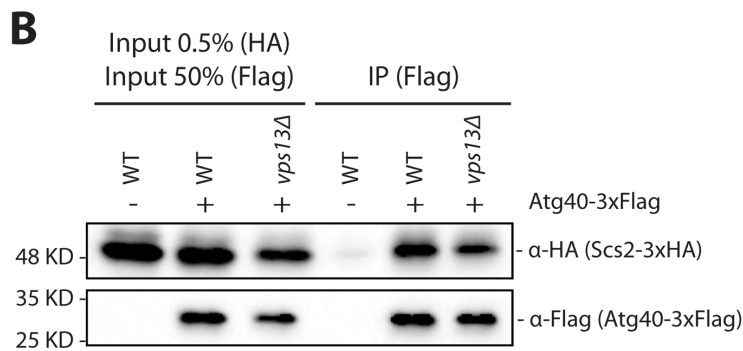

**Fig. S7. Osh2, Osh3 and Vps13 are not needed for the Atg40-Scs2 interaction.** Atg40-3xFlag was immunoprecipitated from WT and several *oshΔ* mutants (A) or a *vps13Δ* mutant (B), as indicated. The precipitates were blotted with anti-HA antibodies to detect Scs2-3xHA, and anti-Flag antibodies to detect Atg40-3xFlag. Crosslinking reagent DSP was used prior to cell lysis.



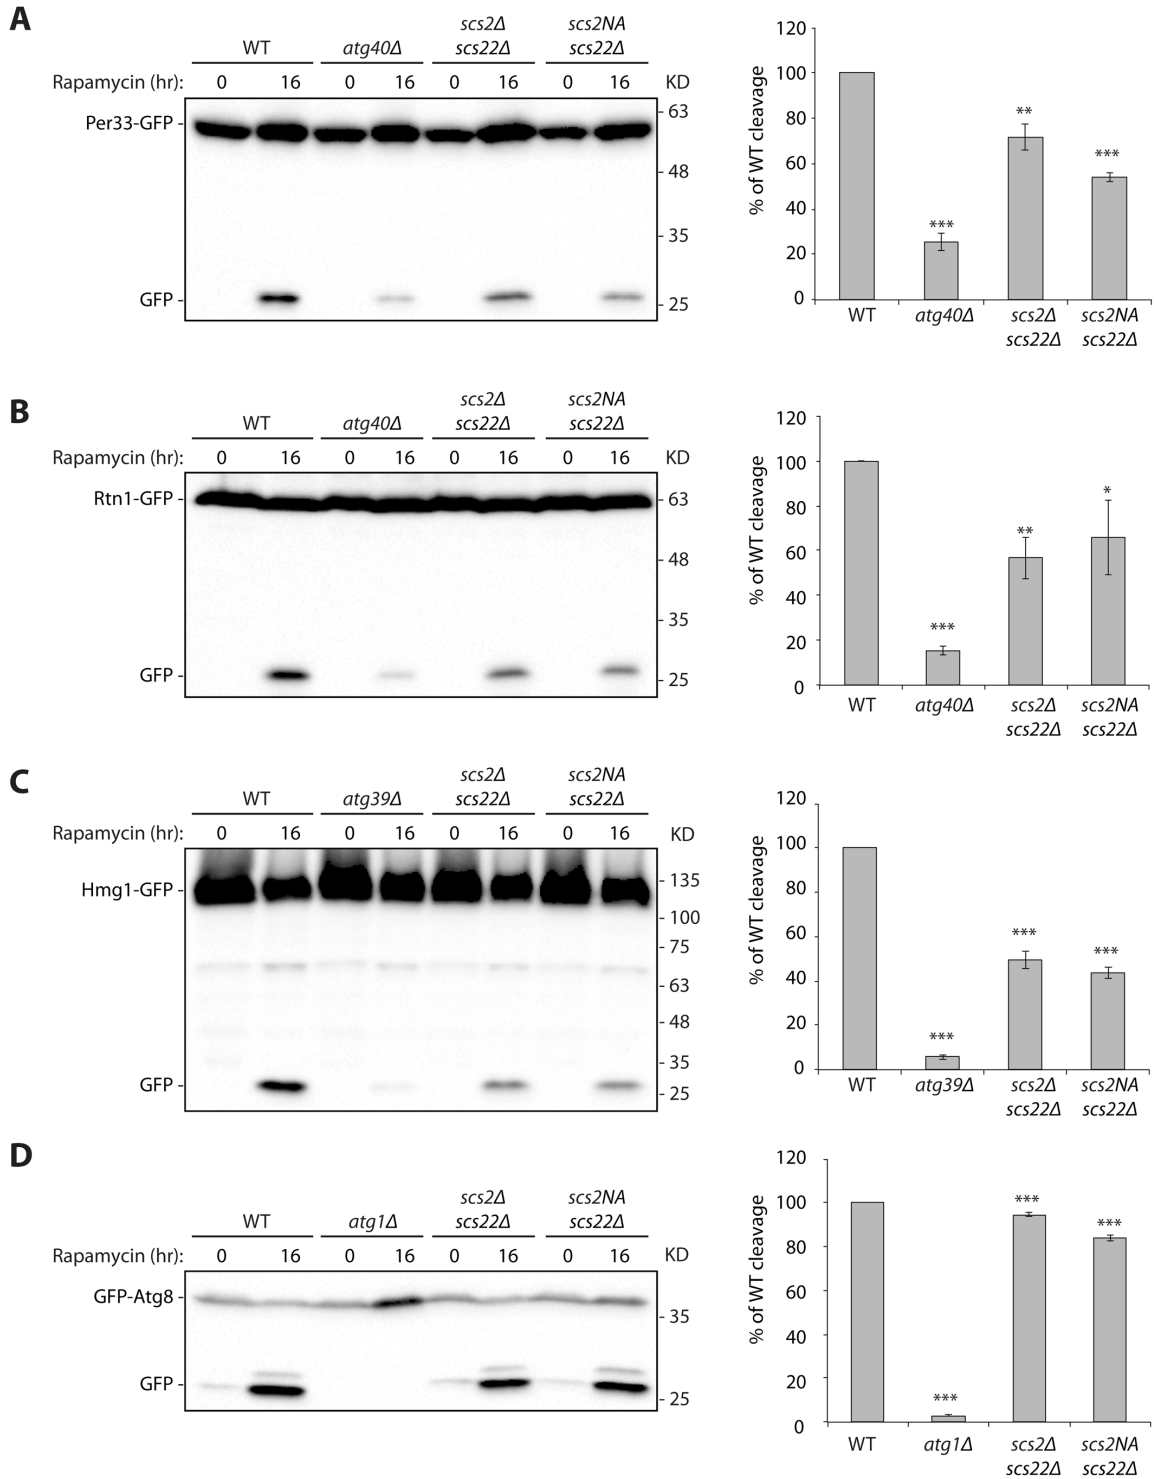

**Fig. S8. The FFAT domain binding motif of Scs2 is important for its function in ER-phagy.** Left panel. Western blot of cells after treatment with rapamycin for 16 h. The anti-GFP antibody was used to detect free GFP and GFP fusion proteins, Per33-GFP (A), Rtn1-GFP (B), Hmg1-GFP (C), and GFP-Atg8 (D). Right panel. The percentage of free GFP divided by the total GFP

amount was quantified. WT was set as 100%. All mutants were normalized to the WT control. Error bars represent SD, N = 3 independent experiments. \*, P < 0.05; \*\*, P < 0.01; \*\*\*, P < 0.001. Student's t-test.

**Table S1. Plasmids for yeast transformation**

| <b>NRB</b> | <b>Plasmid name</b>                                                                                       | <b>Source</b>               |
|------------|-----------------------------------------------------------------------------------------------------------|-----------------------------|
| SFNB2206   | pRS315-Rtn1-GFP (CEN, LEU2)                                                                               | Ferro-Novick lab collection |
| SFNB2288   | pRS306-Atg40 $\Delta$ N-3xEGFP (URA3, BstEII digestion for integration into <i>ATG40</i> locus)           | Ferro-Novick lab collection |
| NRB1660    | pRS303-Atg11-2xmCherry (HIS3, EcoRV digestion to integrate into <i>ATG11</i> locus)                       | This study                  |
| SFNB2335   | pRS305-Per33-GFP (LEU2, BmgBI digestion to integrate into <i>PER33</i> locus)                             | Ferro-Novick lab collection |
| SFNB2374   | pRS305-Hmg1 $\Delta$ N-GFP (LEU2, XbaI digestion for integration into <i>HMG1</i> locus)                  | Ferro-Novick lab collection |
| SFNB1637   | pRS416-GFP-Atg8 (CEN, URA3)                                                                               | Ferro-Novick lab collection |
| NRB1661    | pRS305-Scs2-3xHA (LEU2, PstI digestion for integration into <i>SCS2</i> locus)                            | This study                  |
| NRB1662    | pRS426-pCUP1-ATG40-3xFLAG (2 $\mu$ , URA3)                                                                | This study                  |
| NRB1663    | pRS305-pScs2-Scs2K40N/T42A-3xHA (LEU2, HindIII digestion for integration into <i>SCS2</i> promoter locus) | This study                  |
| NRB1664    | pRS426-pCUP1-Atg40F107A/E112A-3xFLAG (2 $\mu$ , URA3)                                                     | This study                  |
| NRB1665    | pRS426-pCUP1-Atg40F233A/E237A-3xFLAG (2 $\mu$ , URA3)                                                     | This study                  |
| NRB1666    | pRS426-pCUP1-Atg40F34A-3xFLAG (2 $\mu$ , URA3)                                                            | This study                  |
| NRB1667    | pRS306-pScs2-Scs2K40N/T42A-3xHA (URA3, HindIII digestion for integration into <i>SCS2</i> promoter locus) | This study                  |
| SFNB2201   | pRS305-sec61 $\Delta$ N-2xmRFP                                                                            | Ferro-Novick lab collection |
| NRB1668    | pRS305-Scs2-GFP (LEU2, BstAPI digestion for integration into <i>SCS2</i> locus)                           | This study                  |
| NRB1669    | pRS306-Scs2-2xmCherry (URA3, BstAPI digestion for integration into <i>SCS2</i> locus)                     | This study                  |
| NRB1670    | pRS306-Abp1-mCherry (URA3, XbaI digestion for integration into <i>ABP1</i> locus)                         | This study                  |
| NRB1671    | pRS305-Myo5-3xHA (LEU2, BglII digestion for integration into <i>Myo5</i> locus)                           | This study                  |

**Table S2. Yeast strains used in this study**

| <b>NY</b> | <b>Yeast genotype</b>                                                                                                                  | <b>Source</b>               |
|-----------|----------------------------------------------------------------------------------------------------------------------------------------|-----------------------------|
| NY3323    | <i>MATa, leu2-3, 112, his3 Δ 200, ura3-52, Gal+ [end3Δ::KanMX6]</i>                                                                    | This study                  |
| NY3324    | <i>MATa, leu2-3, 112, his3Δ200, ura3-52, Gal+ [end3Δ::KanMX6] [RTN1-GFP::LEU2, CEN]</i>                                                | This study                  |
| SFNY2088  | <i>MATa, ura3-52, leu2-3, 112, his3 Δ 200, [RTN1-GFP::LEU2, CEN]</i>                                                                   | Ferro-Novick lab collection |
| NY3325    | <i>BY4741 MATa his3Δ1 leu2Δ0 met15Δ0 ura3Δ0 [end3Δ::KanMX6]</i>                                                                        | This study                  |
| NY3326    | <i>BY4741 MATa his3Δ1 leu2Δ0 met15Δ0 ura3Δ0 [end3Δ::KanMX6] [RTN1-GFP::LEU2, CEN]</i>                                                  | This study                  |
| SFNY3629  | <i>BY4741 MATa his3Δ1 leu2Δ0 met15Δ0 ura3Δ0 [RTN1-GFP::LEU2, CEN]</i>                                                                  | Ferro-Novick lab collection |
| NY3327    | <i>leu2-3, 112, his3Δ200, ura3-52, [END3-AID1::hphNT] [PAN1-AID2::KanMX6] [TIR1::LEU2] [ATG40-3xGFP::URA3] [ATG11-2xmCherry::HIS3]</i> | This study                  |
| SFNY2962  | <i>MATa, Gal+, ura3-52, leu2-3, 112, his3Δ200, [ATG40-3xGFP::URA3] [ATG11-2xmCherry::LEU2]</i>                                         | Ferro-Novick lab collection |
| SFNY3113  | <i>MATa, leu2-3, 112, his3Δ200, ura3-52, Gal+ [PER33-GFP::LEU2]</i>                                                                    | Ferro-Novick lab collection |
| SFNY3115  | <i>MATa, leu2-3, 112, his3Δ200, ura3-52, Gal+ [atg40Δ::KanMX6] [PER33-GFP::LEU2]</i>                                                   | Ferro-Novick lab collection |
| NY3328    | <i>MATa, leu2-3, 112, his3Δ200, ura3-52, Gal+ [scs2Δ::KanMX6] [scs22Δ::HisMX6] [PER33-GFP::LEU2]</i>                                   | This study                  |
| NY3329    | <i>MATa, leu2-3, 112, his3Δ200, ura3-52, Gal+ [osh2Δ::KanMX6] [osh3Δ::HisMX6] [PER33-GFP::LEU2]</i>                                    | This study                  |
| NY3330    | <i>MATalpha, leu2-3, 112, his3Δ200, ura3-52, Gal+ [myo5Δ::HisMX6] [PER33-GFP::LEU2]</i>                                                | This study                  |
| SFNY3139  | <i>MATa, Gal+, ura3-52, leu2-3, 112, his3Δ200, [atg40Δ::KanMX6] [RTN1-GFP::LEU2, CEN]</i>                                              | Ferro-Novick lab collection |
| NY3331    | <i>MATa, leu2-3, 112, his3Δ200, ura3-52, Gal+ [scs2Δ::KanMX6] [scs22Δ::HisMX6] [RTN1-GFP::LEU2, CEN]</i>                               | This study                  |
| NY3332    | <i>MATa, leu2-3, 112, his3Δ200, ura3-52, Gal+ [osh2Δ::KanMX6] [osh3Δ::HisMX6] [RTN1-GFP::LEU2, CEN]</i>                                | This study                  |
| NY3333    | <i>MATalpha, leu2-3, 112, his3Δ200, ura3-52, Gal+ [myo5Δ::HisMX6] [RTN1-GFP::LEU2, CEN]</i>                                            | This study                  |
| NY3334    | <i>MATa, leu2-3, 112, his3Δ200, ura3-52, Gal+ [HMG1-GFP::LEU2]</i>                                                                     | This study                  |
| SFNY3222  | <i>MATalpha. Gal+, ura3-52, leu2-3, 112, his3Δ200, [atg39Δ::His3MX6] [Hmg1-GFP::LEU2]</i>                                              | Ferro-Novick lab collection |
| NY3335    | <i>MATa, leu2-3, 112, his3Δ200, ura3-52, Gal+ [scs2Δ::KanMX6] [scs22Δ::HisMX6] [HMG1-GFP::LEU2]</i>                                    | This study                  |
| NY3336    | <i>MATa, leu2-3, 112, his3Δ200, ura3-52, Gal+ [osh2Δ::KanMX6] [osh3Δ::HisMX6] [HMG1-GFP::LEU2]</i>                                     | This study                  |
| NY3337    | <i>MATalpha, leu2-3, 112, his3Δ200, ura3-52, Gal+ [myo5Δ::HisMX6] [HMG1-GFP::LEU2]</i>                                                 | This study                  |
| SFNY2860  | <i>MATa ura3-52 leu2-3, 112 his3Δ200 [GFP-ATG8::URA3, CEN]</i>                                                                         | Ferro-Novick lab collection |
| SFNY2861  | <i>MATalpha ura3-52 leu2-3, 112 his3Δ200 [atg1Δ::His3MX6] [GFP-ATG8::URA3, CEN]</i>                                                    | Ferro-Novick lab collection |
| NY3338    | <i>MATa, leu2-3, 112, his3Δ200, ura3-52, Gal+ [scs2Δ::KanMX6] [scs22Δ::HisMX6] [GFP-ATG8::URA3, CEN]</i>                               | This study                  |

|          |                                                                                                                                                   |                             |
|----------|---------------------------------------------------------------------------------------------------------------------------------------------------|-----------------------------|
| NY3339   | <i>MATa, leu2-3, 112, his3Δ200, ura3-52, Gal+ [osh2Δ::KanMX6] [osh3Δ::HisMX6] [GFP-ATG8::URA3, CEN]</i>                                           | This study                  |
| NY3340   | <i>MATalpha, leu2-3, 112, his3Δ200, ura3-52, Gal+ [myo5Δ::HisMX6] [GFP-ATG8::URA3, CEN]</i>                                                       | This study                  |
| SFNY2566 | <i>MATalpha his3-200 leu2-3,112 ura3-52 [pho8Δ60::URA3]</i>                                                                                       | Ferro-Novick lab collection |
| SFNY2979 | <i>MAT alpha, Gal+, ura3-52, leu2-3,112, his3Δ200, [atg1Δ::His3MX6] [pho8Δ60::URA3]</i>                                                           | Ferro-Novick lab collection |
| NY3341   | <i>MATa, leu2-3, 112, his3Δ200, ura3-52, Gal+ [scs2Δ::KanMX6] [scs22Δ::HisMX6] [pho8Δ60::URA3]</i>                                                | This study                  |
| NY3342   | <i>MATa, leu2-3, 112, his3Δ200, ura3-52, Gal+ [osh2Δ::KanMX6] [osh3Δ::HisMX6] [pho8Δ60::URA3]</i>                                                 | This study                  |
| NY3343   | <i>MATalpha, leu2-3, 112, his3Δ200, ura3-52, Gal+ [myo5Δ::HisMX6] [pho8Δ60::URA3]</i>                                                             | This study                  |
| NY3344   | <i>MATalpha Gal+, ura3-52, leu2-3,112, his3Δ200 [pho8Δ60::URA3] [end3Δ::KanMX6]</i>                                                               | This study                  |
| NY3345   | <i>MATa Gal+, ura3-52, leu2-3,112, his3Δ200, [pho8Δ60::URA3] [END3-AID1::hphNT] [PAN1-AID2::KanMX6] [TIR1::LEU2]</i>                              | This study                  |
| NY3346   | <i>MATa, leu2-3, 112, his3Δ200, ura3-52, [MYO3-AID1::hphNT] [MYO5-AID2::KanMX6] [pGPD-TIR1::LEU2] [ATG40-3xGFP::URA3] [ATG11-2xmCherry::HIS3]</i> | This study                  |
| NY3347   | <i>MATa his3Δ1 leu2Δ0 met15Δ0 ura3Δ0 [rvs167Δ::KanMX4] [RTN1-GFP::LEU2]</i>                                                                       | This study                  |
| SFNY3323 | <i>MATalpha, Gal+, ura3-52, leu2-3,112, his3Δ200, [pep4Δ::KanMX6]</i>                                                                             | Ferro-Novick lab collection |
| SFNY3549 | <i>MAT alpha, Gal+, ura3-52, leu2-3,112, his3Δ200, [pep4Δ::KanMX6] [atg14Δ::His3MX6]</i>                                                          | Ferro-Novick lab collection |
| SFNY3324 | <i>MATa, Gal+, ura3-52, leu2-3,112, his3Δ200, [pep4Δ::His3MX6] [atg40Δ::KanMX6]</i>                                                               | Ferro-Novick lab collection |
| NY3348   | <i>MATa ura3-52, leu2-3,112, his3Δ200, [pep4Δ::His3MX6] [scs2Δ::KanMX6] [scs22Δ::His3MX6]</i>                                                     | This study                  |
| NY3349   | <i>MATalpha, ura3-52, leu2-3,112, his3Δ200, [pep4Δ::His3MX6] [osh2Δ::KanMX6] [osh3Δ::His3MX6]</i>                                                 | This study                  |
| NY3350   | <i>MATa ura3-52 leu2-3, 112 his3Δ200 [SCS2-3xHA::LEU2]</i>                                                                                        | This study                  |
| NY3351   | <i>MATa ura3-52 leu2-3, 112 his3Δ200 [SCS2-3xHA::LEU2] [pRS426-pCUP1-ATG40-3xFLAG::URA3, 2u]</i>                                                  | This study                  |
| NY3352   | <i>MATa, leu2-3, 112, his3Δ200, ura3-52, Gal+ [MYO5-3xHA::LEU2]</i>                                                                               | This study                  |
| NY3353   | <i>MATa, leu2-3, 112, his3Δ200, ura3-52, Gal+ [MYO5-3xHA::LEU2] [pRS426-pCUP1-ATG40-3xFLAG::URA3, 2u]</i>                                         | This study                  |
| NY3354   | <i>MATa, ura3-52, leu2-3,112, his3Δ200, [scs2Δ::KanMX6] [scs2K40N/T42A-3xHA::LEU2] [pCUP1-ATG40-3xFLAG::URA3, 2u]</i>                             | This study                  |
| NY3355   | <i>MATa, ura3-52, leu2-3,112, his3Δ200, [scs2-3xHA::LEU2] [pCUP1-atg40F107A/E112A-3xFLAG::URA3, 2u]</i>                                           | This study                  |
| NY3356   | <i>MATa ura3-52 leu2-3, 112 his3Δ200 [SCS2-3xHA::LEU2] [pCUP1-atg40F233A/E237A-3xFLAG::URA3]</i>                                                  | This study                  |
| NY3357   | <i>MATa ura3-52 leu2-3, 112 his3Δ200 [SCS2-3xHA::LEU2] [pCUP1-atg40F34A-3xFLAG::URA3]</i>                                                         | This study                  |
| NY3358   | <i>MATa ura3-52 leu2-3, 112 his3Δ200 [SCS2-3xHA::LEU2] [pRS426-pCUP1-ATG39-3xFLAG::URA3, 2u]</i>                                                  | This study                  |
| NY3359   | <i>MATa, leu2-3, 112, his3Δ200, ura3-52, Gal+ [osh2Δ::KanMX6] [SCS2-3xHA::LEU2] [pRS426-pCUP1-ATG40-3xFLAG::URA3, 2u]</i>                         | This study                  |
| NY3360   | <i>MATalpha, leu2-3, 112, his3Δ200, ura3-52, Gal+ [osh3Δ::HisMX6] [SCS2-3xHA::LEU2] [pRS426-pCUP1-ATG40-3xFLAG::URA3, 2u]</i>                     | This study                  |

|        |                                                                                                                                                                                                                                                                                                              |            |
|--------|--------------------------------------------------------------------------------------------------------------------------------------------------------------------------------------------------------------------------------------------------------------------------------------------------------------|------------|
| NY3361 | <i>MAT</i> $\alpha$ , <i>leu2-3</i> , 112, <i>his3</i> $\Delta$ 200, <i>ura3-52</i> , <i>Gal+</i> [ <i>osh2</i> $\Delta$ :: <i>KanMX6</i> ] [ <i>osh3</i> $\Delta$ :: <i>HisMX6</i> ] [ <i>SCS2-3xHA</i> :: <i>LEU2</i> ] [ <i>pRS426-pCUP1-ATG40-3xFLAG</i> :: <i>URA3</i> , 2 $\mu$ ]                      | This study |
| NY3362 | <i>MAT</i> $\alpha$ , <i>ura3-52</i> , <i>leu2-3</i> , 112, <i>his3</i> $\Delta$ 200, [ <i>vps13</i> $\Delta$ :: <i>KanMX6</i> ] [ <i>SCS2-3xHA</i> :: <i>LEU2</i> ] [ <i>pRS426-pCUP1-ATG40-3xFLAG</i> :: <i>URA3</i> , 2 $\mu$ ]                                                                           | This study |
| NY3363 | <i>MAT</i> $\alpha$ , <i>leu2-3</i> , 112, <i>his3</i> $\Delta$ 200, <i>ura3-52</i> , <i>Gal+</i> [ <i>scs2</i> $\Delta$ :: <i>KanMX6</i> ] [ <i>scs22</i> $\Delta$ :: <i>HisMX6</i> ] [ <i>scs2K40N/T42A-3xHA</i> :: <i>URA3</i> ] [ <i>PER33-GFP</i> :: <i>LEU2</i> ]                                      | This study |
| NY3364 | <i>MAT</i> $\alpha$ , <i>leu2-3</i> , 112, <i>his3</i> $\Delta$ 200, <i>ura3-52</i> , <i>Gal+</i> [ <i>scs2</i> $\Delta$ :: <i>KanMX6</i> ] [ <i>scs22</i> $\Delta$ :: <i>HisMX6</i> ] [ <i>scs2K40N/T42A-3xHA</i> :: <i>LEU2</i> ] [ <i>RTN1-GFP</i> :: <i>URA3</i> , <i>CEN</i> ]                          | This study |
| NY3365 | <i>MAT</i> $\alpha$ , <i>leu2-3</i> , 112, <i>his3</i> $\Delta$ 200, <i>ura3-52</i> , <i>Gal+</i> [ <i>scs2</i> $\Delta$ :: <i>KanMX6</i> ] [ <i>scs22</i> $\Delta$ :: <i>HisMX6</i> ] [ <i>scs2K40N/T42A-3xHA</i> :: <i>URA3</i> ] [ <i>HMG1-GFP</i> :: <i>LEU2</i> ]                                       | This study |
| NY3366 | <i>MAT</i> $\alpha$ , <i>leu2-3</i> , 112, <i>his3</i> $\Delta$ 200, <i>ura3-52</i> , <i>Gal+</i> [ <i>scs2</i> $\Delta$ :: <i>KanMX6</i> ] [ <i>scs22</i> $\Delta$ :: <i>HisMX6</i> ] [ <i>scs2K40N/T42A-3xHA</i> :: <i>LEU2</i> ] [ <i>GFP-ATG8</i> :: <i>URA3</i> , <i>CEN</i> ]                          | This study |
| NY3367 | <i>MAT</i> $\alpha$ , <i>ura3-52</i> , <i>leu2-3</i> , 112, <i>his3</i> $\Delta$ 200, [ <i>rtn1</i> $\Delta$ :: <i>KanMX4</i> ] [ <i>ATG40-3xGFP</i> :: <i>LEU2</i> ] [ <i>SEC61-2xRFP</i> :: <i>URA3</i> ]                                                                                                  | This study |
| NY3368 | <i>MAT</i> $\alpha$ , <i>ura3-52</i> , <i>leu2-3</i> , 112, <i>his3</i> $\Delta$ 200, [ <i>rtn1</i> $\Delta$ :: <i>KanMX4</i> ] [ <i>SCS2-GFP</i> :: <i>LEU2</i> ] [ <i>SEC61-2xRFP</i> :: <i>URA3</i> ]                                                                                                     | This study |
| NY3369 | <i>MAT</i> $\alpha$ , <i>ura3-52</i> , <i>leu2-3</i> , 112, <i>his3</i> $\Delta$ 200, [ <i>rtn1</i> $\Delta$ :: <i>KanMX4</i> ] [ <i>ATG40-3xGFP</i> :: <i>LEU2</i> ] [ <i>SCS2-2xmCherry</i> :: <i>URA3</i> ]                                                                                               | This study |
| NY3370 | <i>MAT</i> $\alpha$ , <i>leu2-3</i> , 112, <i>his3</i> $\Delta$ 200, <i>ura3-52</i> , <i>Gal+</i> [ <i>rtn1</i> $\Delta$ :: <i>KanMX4</i> ] [ <i>scs2</i> $\Delta$ :: <i>KanMX6</i> ] [ <i>scs22</i> $\Delta$ :: <i>HisMX6</i> ] [ <i>ATG40-3xGFP</i> :: <i>LEU2</i> ] [ <i>SEC61-2xRFP</i> :: <i>URA3</i> ] | This study |
| NY3371 | <i>MAT</i> $\alpha$ , <i>ura3-52</i> , <i>leu2-3</i> , 112, <i>his3</i> $\Delta$ 200, [ <i>rtn1</i> $\Delta$ :: <i>KanMX4</i> ] [ <i>ATG40-3xGFP</i> :: <i>LEU2</i> ] [ <i>MYO5-mCherry</i> :: <i>URA3</i> ]                                                                                                 | This study |
| NY3372 | <i>MAT</i> $\alpha$ , <i>ura3-52</i> , <i>leu2-3</i> , 112, <i>his3</i> $\Delta$ 200, [ <i>rtn1</i> $\Delta$ :: <i>KanMX4</i> ] [ <i>ATG40-3xGFP</i> :: <i>LEU2</i> ] [ <i>ABP1-mCherry</i> :: <i>URA3</i> ]                                                                                                 | This study |
| NY3373 | <i>MAT</i> $\alpha$ , <i>ura3-52</i> , <i>leu2-3</i> , 112, <i>his3</i> $\Delta$ 200, [ <i>rtn1</i> $\Delta$ :: <i>KanMX4</i> ] [ <i>SCS2-GFP</i> :: <i>LEU2</i> ] [ <i>ABP1-mCherry</i> :: <i>URA3</i> ]                                                                                                    | This study |

**Movie S1 (separate file). Actin-binding protein Abp1 transiently co-localizes with Atg40.**

Cells expressing Atg40-3xGFP and Abp1-mCherry in an *rtn1Δ* strain background were treated with rapamycin for 3 h, collected and examined by fluorescence microscopy. A 3 min movie with 54 total frames per channel was taken. The final movie is 2 fps.

**Movie S2 (separate file). Actin-binding protein Abp1 transiently co-localizes with Scs2.**

Cells expressing Scs2-GFP and Abp1-mCherry in an *rtn1Δ* strain background were treated with rapamycin for 3 h, collected and examined by fluorescence microscopy. A 3 min movie with 54 total frames per channel was taken. The final movie is 2 fps.
